# Supplementary material for: Polymeric hydrogel integrated paper-based potentiometric ion-sensing device for the determination of sodium ions in human urine
Source: Royal Society of Chemistry journal article supplement (doi:10.1039/d4an01505c), 2025-01-01
Supplement: d4an01505c1.pdf [file d4an01505c1.pdf]

## Supplementary information

### Polymeric hydrogel integrating paper-based potentiometric ion-sensing device for determination of sodium ion in human urine

Kanyapat Teekayupak,<sup>a</sup> Pattarachaya Preechakasedkit,<sup>b</sup> Natthaya Chuaypen,<sup>c</sup>

Thasinas Dissayabutra,<sup>c</sup> Peter A. Lieberzeit,<sup>d</sup> Orawon Chailapakul,<sup>\*a</sup> Nipapan Ruecha,<sup>\*a, b</sup>

Daniel Citterio <sup>\*e</sup>

---

<sup>a</sup> *Electrochemistry and optical spectroscopy Center of Excellence (EOSCE), Department of Chemistry, Faculty of Science, Chulalongkorn University, Pathumwan, Bangkok 10330, Thailand. Email: corawon@chula.ac.th, nipapan.r@chula.ac.th*

<sup>b</sup> *Metallurgy and Materials Science Research Institute, Chulalongkorn University, Soi Chula 12, Phayathai Rd., Pathumwan, Bangkok 10330, Thailand.*

<sup>c</sup> *Metabolic Disease in Gastrointestinal and Urinary System Research Unit, Department of Biochemistry, Faculty of Medicine, Chulalongkorn University Bangkok 10330, Thailand*

<sup>d</sup> *Department of Physical Chemistry, Faculty of Chemistry, University of Vienna, Waehringer Strasse 42, 1090 Vienna, Austria*

<sup>e</sup> *Department of Applied Chemistry, Faculty of Science and Technology, Keio University, 3-14-1 Hiyoshi, Kohoku-ku, Yokohama, Kanagawa 223-8522, Japan. Email: citterio@applc.keio.ac.jp*

\* Corresponding authors

**Table S1** Printing parameters for all solutions used in device fabrication

| <b>Ion selective electrode (s-ISE)</b> |                                        | <b>Reference electrode (s-RE)</b> |                                        |
|----------------------------------------|----------------------------------------|-----------------------------------|----------------------------------------|
| <b>Solutions</b>                       | <b>Printing condition<br/>(layers)</b> | <b>Solutions</b>                  | <b>Printing condition<br/>(layers)</b> |
| CNT ink                                | 10                                     | Ag ink                            | 10                                     |
| AuNPs                                  | 30                                     | FeCl <sub>3</sub>                 | 4                                      |
| CH <sub>3</sub> COOLi-hydrogel         | 10                                     | KCl-hydrogel                      | 10                                     |
| ISM                                    | 8                                      | REM                               | 8                                      |

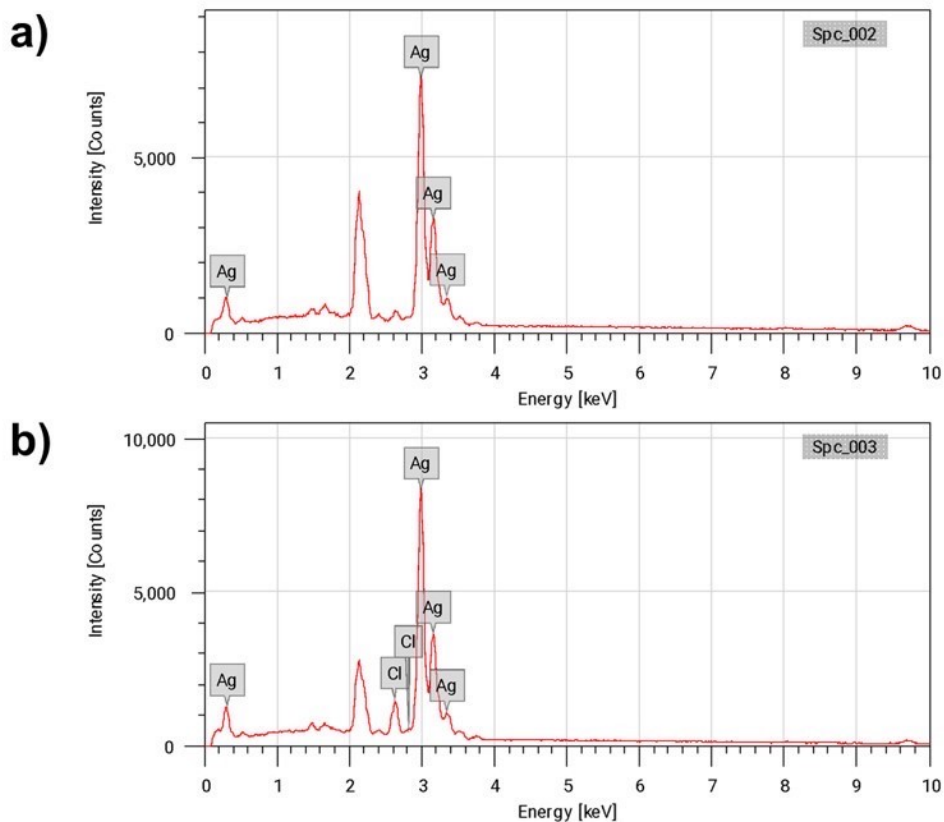

**Fig. S1** EDX analysis of a) sintered Ag and b) p-Ag/AgCl electrode on photo paper.

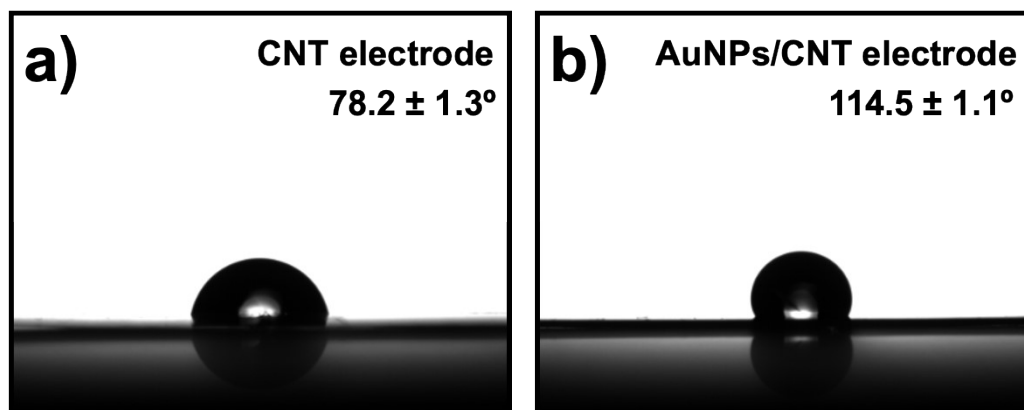

**Fig. S2** Contact angle measurements of (a) CNT electrode and (b) AuNPs/CNT electrode.

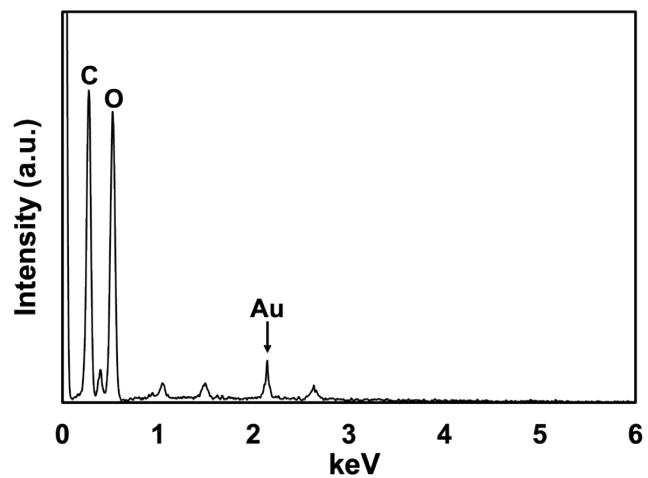

**Fig. S3** SEM-EDX spectrum of AuNP modified CNT electrode.

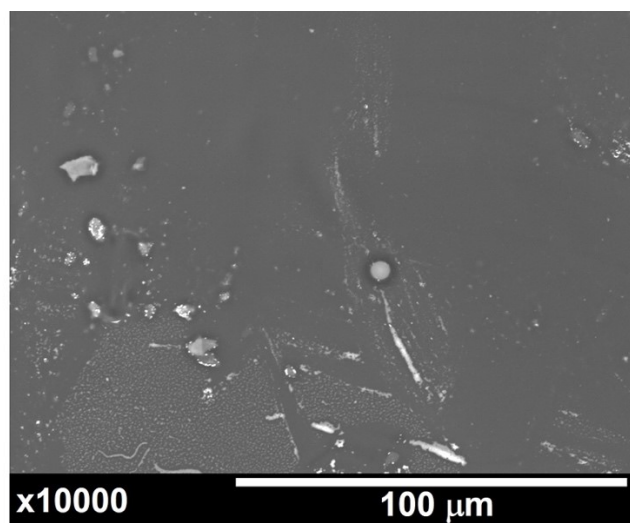

**Fig. S4** SEM image of ISM-AuNP/CNT electrode with  $\times 10,000$  magnification

**Table S2** Analytical performance of ISM-CH<sub>3</sub>COOLi hydrogel-AuNP/CNT paper-based ion-sensing devices with different concentrations of CH<sub>3</sub>COOLi for sodium ion measurement

| CH <sub>3</sub> COOLi concentration (M) | Linear range (M)      | Slope (mV/dec) | <i>E</i> <sup>0</sup> (mV) |
|-----------------------------------------|-----------------------|----------------|----------------------------|
| 0.01                                    | 10 <sup>-6</sup> to 1 | 54.10 ± 0.78   | 150.41 ± 1.97              |
| 0.025                                   | 10 <sup>-6</sup> to 1 | 55.31 ± 0.92   | 131.16 ± 2.01              |
| 0.05                                    | 10 <sup>-7</sup> to 1 | 56.42 ± 0.68   | 190.35 ± 1.55              |
| 0.075                                   | 10 <sup>-6</sup> to 1 | 53.56 ± 0.95   | 124.01 ± 1.83              |
| 0.1                                     | 10 <sup>-5</sup> to 1 | 45.85 ± 0.87   | 42.41 ± 1.94               |
| 0.2                                     | 10 <sup>-5</sup> to 1 | 44.92 ± 0.69   | 27.04 ± 1.61               |

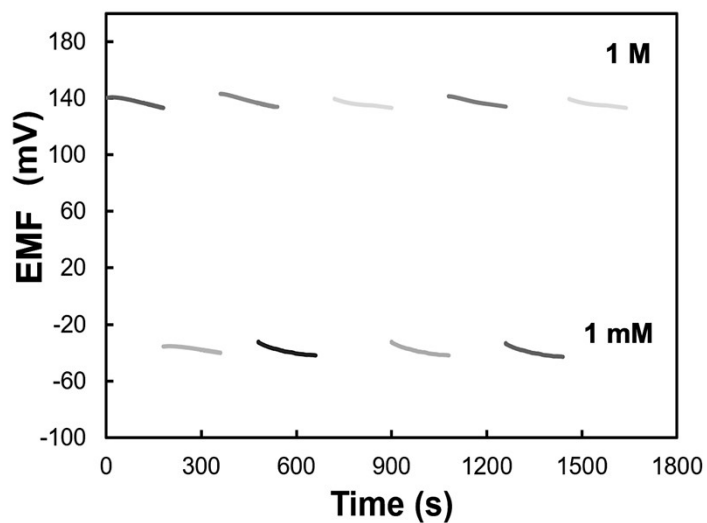

**Fig. S5** The repeatability of the ISM-CH<sub>3</sub>COOLi hydrogel-AuNP/CNT paper-based ion-sensing devices; each potentiometric response has been obtained by measurements with the same device.

**Table S3** Comparison of analytical performances of all-solid-state potentiometric sensors for Na<sup>+</sup> detection

| <b>Solid contact</b>                        | <b>Linear range<br/>(M)</b>         | <b>LOD<br/>(M)</b>      | <b>Sensitivity<br/>(mv/decade)</b> | <b>Sample</b> | <b>Refs</b> |
|---------------------------------------------|-------------------------------------|-------------------------|------------------------------------|---------------|-------------|
| PS/AuNPs                                    | 10 <sup>-4</sup> – 10 <sup>-2</sup> | 6.8 × 10 <sup>-5</sup>  | 50.3 ± 1.3                         | Urine         | 1           |
| CNT/Au                                      | 10 <sup>-3</sup> – 10 <sup>-1</sup> | –                       | 60.0 ± 4.0                         | Sweat         | 2           |
| POT/Carbon                                  | 10 <sup>-4</sup> – 10 <sup>-1</sup> | –                       | 56.4 ± 2.2                         | Sweat         | 3           |
| G/ PEDOT:PSS                                | 10 <sup>-4</sup> – 1                | 36 × 10 <sup>-6</sup>   | 62.5 ± 2.1                         | Urine         | 4           |
| PEDOT/Carbon                                | 10 <sup>-5</sup> – 10 <sup>-1</sup> | –                       | 55.5 ± 4.9                         | Sweat         | 5           |
| POT/SWCNTs                                  | 10 <sup>-3</sup> – 10 <sup>-1</sup> | –                       | 58.6 ± 0.1                         | Sweat         | 6           |
| PEDOT:PSS/Au                                | 10 <sup>-5</sup> – 10 <sup>-2</sup> | 1.67 × 10 <sup>-6</sup> | 56.5                               | Sweat         | 7           |
| Au/CNT/Au                                   | 10 <sup>-3</sup> – 1                | –                       | 55.5 ± 0.3                         | Sweat         | 8           |
| CB/Carbon                                   | 10 <sup>-4</sup> – 1                | 63 × 10 <sup>-6</sup>   | 58.0 ± 3.0                         | Sweat         | 9           |
| CH <sub>3</sub> COOLi hydrogel-<br>AuNP/CNT | 10 <sup>-7</sup> – 1                | 10 <sup>-7</sup>        | 56.4 ± 0.7                         | Urine         | This work   |

*Abbreviations:* PS, Polystyrene; AuNPs, Gold nanoparticles; POT, poly(3-octylthiophene-2,5-diyl); G, Graphene; PEDOT:PSS, Poly(3,4-ethylenedioxythiophene) polystyrenesulfonate; SWCNTs, Single-walled carbon nanotubes; CB, Carbon black

## References

1. F. Wang, Y. Liu, M. Zhang, F. Zhang and P. He, *Analytical Chemistry*, 2021, **93**, 8318-8325.
2. A. M. Zamarayeva, N. A. Yamamoto, A. Toor, M. E. Payne, C. Woods, V. I. Pister, Y. Khan, J. W. Evans and A. C. Arias, *APL Materials*, 2020, **8**.
3. P. Pirovano, M. Dorrian, A. Shinde, A. Donohoe, A. J. Brady, N. M. Moyna, G. Wallace, D. Diamond and M. McCaul, *Talanta*, 2020, **219**, 121145.
4. N. Ruecha, O. Chailapakul, K. Suzuki and D. Citterio, *Analytical chemistry*, 2017, **89**, 10608-10616.
5. G. Matzeu, C. O'Quigley, E. McNamara, C. Zuliani, C. Fay, T. Glennon and D. Diamond, *Analytical Methods*, 2016, **8**, 64-71.
6. M. Rostampour, D. J. Lawrence Jr, Z. Hamid, J. Darensbourg, P. Calvo-Marzal and K. Y. Chumbimuni-Torres, *Electroanalysis*, 2023, **35**, e202200121.
7. H. Liu, Z. Gu, Q. Zhao, S. Li, X. Ding, X. Xiao and G. Xiu, *Sensors and Actuators B: Chemical*, 2022, **355**, 131102.
8. H.-R. Lim, Y. Lee, K. A. Jones, Y.-T. Kwon, S. Kwon, M. Mahmood, S. M. Lee and W.-H. Yeo, *Sensors and Actuators B: Chemical*, 2021, **331**, 129416.
9. V. Mazzaracchio, A. Serani, L. Fiore, D. Moscone and F. Arduini, *Electrochimica Acta*, 2021, **394**, 139050.
